# Supplementary material
Source: PubMed Central journal article supplement (PMC2772496)
Supplement: supp_191_22_6928__1.pdf [file supp_191_22_6928__1.pdf]

1 Table S1. Primers used in this study.

| Primer                 | Sequence <sup>a</sup>                               | Added site(s)              |
|------------------------|-----------------------------------------------------|----------------------------|
| HPT for                | <u>GGCGCGCCGGATCCGGACGTCGACCTGAGGTAAT</u>           | <i>Ascl</i> , <i>BamHI</i> |
| HPT rev                | <u>GGCGCGCCGGATCCAGCTCACTGATCCCCAAAGA</u>           | <i>Ascl</i> , <i>BamHI</i> |
| CB1L                   | <u>GGCGCGCCACTAGTCCGTAAGCCTCTTGATCTGG</u>           | <i>Ascl</i> , <i>SpeI</i>  |
| CB1R                   | <u>GGCGCGCCGGATCCGAAAAGCCGCTGATTTCAAG</u>           | <i>Ascl</i> , <i>BamHI</i> |
| CB2L                   | <u>GGCGCGCCACTAGTGCAACTGGAAGACAGGAAGC</u>           | <i>Ascl</i> , <i>SpeI</i>  |
| CB2R                   | <u>GGCGCGCCGGATCCGCGTTTGCGGTTTTATCAAT</u>           | <i>Ascl</i> , <i>BamHI</i> |
| CB3L                   | <u>GGCGCGCCACTAGTAGCAGTAACCTCTGGCAGGA</u>           | <i>Ascl</i> , <i>SpeI</i>  |
| CB3R                   | <u>GGCGCGCCGGATCCGCAGCACAGGGAGAAAGAAC</u>           | <i>Ascl</i> , <i>BamHI</i> |
| mtaCB2for(AB)          | GATCTAAATGGAGGTTTAGAAATATGTTGGATTTGACACTGGAAGACA    | none                       |
| p-mtaC1+mtaC2rev(AB)   | TGTCTTCCAGTGTCAAATCCAACATATTTCTAAACCTCCATTTAGATC    | none                       |
| mtaCB3for(AB)          | GATCTAAATGGAGGTTTAGAAATATGATAGATATAGACCCAGTGGTATTC  | none                       |
| p-mtaC1+mtaC3rev(AB)   | GAATACCACTGGGGTCTATATCTATCATATTTCTAAACCTCCATTTAGATC | none                       |
| mtaCB1(p2-1)for        | CATTATTAATGGAGGTTAAATATGTTGGACTTTACAGAGGCA          | none                       |
| p-mtaC2+mtaC1(p2-1)rev | TGCCTCTGTAAAGTCCAACATATTTAAACCTCCATTTAATAATG        | none                       |
| mtaCB3(p2-3)for        | ATTATTAATGGAGGTTAAATATGATAGATATAGACCCAGTGGTATTC     | none                       |
| p-mtaC2+mtaC3(p2-3)rev | GAATACCACTGGGGTCTATATCTATCATATTTAAACCTCCATTTAATAAT  | none                       |

---

|                         |                                                  |              |
|-------------------------|--------------------------------------------------|--------------|
| mtaCB1(p3-1)for         | ATACTAAAATGGAGGTTAAATATATGTTGGACTTTACAGAGGCA     | none         |
| p-mtaC3+mtaC1(p3-1)rev  | TGCCTCTGTAAAGTCCAACATATATTTAACCTCCATTTTAGTAT     | none         |
| mtaCB2(p3-2)for         | TACTAAAATGGAGGTTAAATATATGTTGGATTTGACACTGGAAGAC   | none         |
| p-mtaC3+mtaC2(p3-2)rev  | GTCTTCCAGTGTCAAATCCAACATATATTTAACCTCCATTTTAGTA   | none         |
| <i>mtaC1</i> art op fwd | GGCGCGCCCATATGTTGGACTTTACAGAGGC                  | <i>Ndel</i>  |
| <i>mtaC1</i> art op rev | GGCGCGCCATGCATGGATCCTCAGTGCTTGGAATTTCTCTCT       | <i>Nsil</i>  |
| <i>mtaC2</i> art op fwd | GGCGCGCCCATATGTTGGATTTGACACTGGA                  | <i>Ndel</i>  |
| <i>mtaC2</i> art op rev | GGCGCGCCATGCATGGATCCTTAGTGCTTGGAATTCCT           | <i>Nsil</i>  |
| <i>mtaC3</i> art op fwd | GGCGCGCCCATATGGAGGTTAAATATTTGATAG                | <i>Ndel</i>  |
| <i>mtaC3</i> art op rev | GGCGCGCCATGCATGGATCCTCAGTGTTTATGGAATTTCT         | <i>Nsil</i>  |
| <i>mtaB1</i> art op fwd | GGCGCGCCAGATCTAATGGAGGTTAAATATGGCAGCAAAAAGATACAC | <i>BgIII</i> |
| <i>mtaB1</i> fuse fwd   | ATGTCCTTGCCTACGACAACGCATACAAGGTCGGCGAAGC         | none         |
| <i>mtaB1</i> fuse rev   | GCTTCGCCGACCTTGTATGCGTTGTCGTAGGCAAGGACAT         | none         |
| <i>mtaB1</i> art op rev | GGCGCGCCATGCATGGATCCTTAGAAGCCGTAGTTCTCGGGGAG     | <i>Nsil</i>  |
| <i>mtaB2</i> art op fwd | GGCGCGCCAGATCTAATGGAGGTTAAATATGGTAAAGAAATACACTTC | <i>BgIII</i> |
| <i>mtaB2</i> fuse fwd   | TTAAACTCGGAAAGGCCAAAGGATCTCAGAGACATCCTCAC        | none         |
| <i>mtaB2</i> fuse rev   | GTGAGGATGTCTCTGAGATCCTTTGCCTTTCCGAGTTTAA         | none         |
| <i>mtaB2</i> art op rev | GGCGCGCCATGCATGGATCCTTAGAGCCCGTAGTTTTCTG         | <i>Nsil</i>  |

---

---

|                         |                                                            |              |
|-------------------------|------------------------------------------------------------|--------------|
| <i>mtaB3</i> art op fwd | GGCGCGCC <u>AGATCT</u> AATGGAGGTTAAAATATGGCAGTAACAAGATGTAC | <i>BgIII</i> |
| <i>mtaB3</i> art op rev | GGCGCGCC <u>ATGCAT</u> GGATCCTTAGAGGCCGTAGTTCTCCG          | <i>Nsil</i>  |
| <i>mtaA1</i> art op fwd | GGCGCGCC <u>AGATCT</u> AATGGAGGTTAAAATATGACCGATATGAGCGAATT | <i>BgIII</i> |
| <i>mtaA1</i> art op rev | GGCGCGCC <u>ATGCAT</u> TTAGGCGTAGAATTCGTTTCTTGC            | <i>Nsil</i>  |
| <i>mtaA2</i> art op fwd | GGCGCGCCAGATCTAATGGAGGTTAAAATATGAGTGACATGACACTTAA          | <i>BgIII</i> |
| <i>mtaA2</i> art op rev | GGCGCGCC <u>ATGCAT</u> TCAAGCGTAATACTCGTCCC                | <i>Nsil</i>  |
| RT <i>mtaC1F</i>        | ACTCCGAAACTGCCCCTGTA                                       | none         |
| RT <i>mtaC1R</i>        | CGTCGCCTTCTGCAACGT                                         | none         |
| RT <i>mtaC2F</i>        | GCAAGGTCGTCTGCCATGT                                        | none         |
| RT <i>mtaC2R</i>        | CAGCAACAATATTCTTTCCGATGT                                   | none         |
| RT <i>mtaC3F</i>        | CTGCCGACGCCATGCT                                           | none         |
| RT <i>mtaC3R</i>        | CTTTCCCGGCTTTTTGCTT                                        | none         |
| RT <i>mtaB1F</i>        | CCGGTGCTGACCTGCTTT                                         | none         |
| RT <i>mtaB1R</i>        | TGCGTGGTCGAATACTTCCTT                                      | none         |
| RT <i>mtaB2F</i>        | TTACAAGGTTCGAAACCAATGCT                                    | none         |
| RT <i>mtaB2R</i>        | CATCGGTAAGGGCTTCAAGGT                                      | none         |
| RT <i>mtaB3F</i>        | GGTCCGAGACTCTTGCATACG                                      | none         |
| RT <i>mtaB3R</i>        | TTTCATTGCCTGAATCAAGAGCTA                                   | none         |

---

---

|                  |                          |      |
|------------------|--------------------------|------|
| RT <i>mtaA1F</i> | <u>GGCCCTGACGTGCCAAT</u> | none |
| RT <i>mtaA1R</i> | CGGATGCGACTGTGATAGGA     | none |
| RT <i>mtaA2F</i> | CCTCCATGTCTGCGGGAAT      | none |
| RT <i>mtaA2R</i> | AAGCCGCAATCTGCCATATAG    | none |
| RT <i>uidAF</i>  | TGGCCTGGCAGGAGAACT       | none |
| RT <i>uidAR</i>  | CGTATCCACGCCGTATTCG      | none |
| RT <i>rpoA1F</i> | ATGCAGAAGCTCGGAAAAGC     | none |
| RT <i>rpoA1R</i> | GTCCCATGTGGCTATCTGGAA    | none |

---

2 <sup>a</sup> Added restriction sites are underlined.

3

4

5

5 Table S2. Plasmids used in this study.

6

| Plasmid | Description or construction                                                                                                                                                                                                                                  | Source     |
|---------|--------------------------------------------------------------------------------------------------------------------------------------------------------------------------------------------------------------------------------------------------------------|------------|
| pJK200  | Puromycin resistant plasmid with the $\phi$ C31 <i>attB</i> site s                                                                                                                                                                                           | (1)        |
| pMP44   | Vector used to construct UP and DOWN region cassettes to delete genes from the <i>M. acetivorans</i> C2A chromosome using the markerless exchange method.                                                                                                    | (2)        |
| pAMG63  | Plasmid for insertion of $\phi$ C31 <i>int-attP</i> into <i>M. acetivorans hpt</i> locus                                                                                                                                                                     | (1)        |
| pAB5    | Plasmid for insertion of $\phi$ C31 <i>int-attP</i> into <i>M. acetivorans hpt</i> locus of $\Delta hpt$ strains. The <i>PmcrB-hpt</i> region was amplified (using HPTfor and HPTrev) from pMP44, digested with BamHI and cloned into BamHI-digested pAMG63. | This study |
| pAB7i   | <i>HindIII/BamHI</i> -digested <i>mtaCB1</i> operon including a 1000 bp upstream region PCR product (using primers CB1L and CB1R) was cloned into <i>HindIII/BamHI</i> -digested pWM321                                                                      | This study |
| pAB7    | <i>HindIII/BamHI</i> -digested pAB7i was sub-cloned into <i>HindIII/BamHI</i> -digested pJK200                                                                                                                                                               | This study |
| pAB8i   | <i>HindIII/BamHI</i> -digested <i>mtaCB2</i> operon including the 1000 bp upstream region PCR product (using primers CB2L and CB2R) was cloned into <i>HindIII/BamHI</i> -digested pWM321                                                                    | This study |
| pAB8    | <i>HindIII/BamHI</i> -digested pAB8i was sub-cloned into <i>HindIII/BamHI</i> -digested pJK200                                                                                                                                                               | This study |
| pAB9i   | <i>HindIII/BamHI</i> -digested <i>mtaCB3</i> operon including the 1000 bp upstream region PCR product (using primers CB3L and CB3R) was cloned into <i>HindIII/BamHI</i> -digested pWM321                                                                    | This study |
| pAB9    | <i>HindIII/BamHI</i> -digested pAB9i was sub-cloned into <i>HindIII/BamHI</i> -digested pJK200                                                                                                                                                               | This study |

---

|        |                                                                                                                                                                                                                                                                             |            |
|--------|-----------------------------------------------------------------------------------------------------------------------------------------------------------------------------------------------------------------------------------------------------------------------------|------------|
| pAB10i | <i>HindIII/BamHI</i> -digested fusion PCR product fusing the <i>mtaCB1</i> 1000 bp upstream region with the <i>mtaCB2</i> operon (using primers CB1L, p- <i>mtaC1+mtaC2rev</i> (AB), <i>mtaCB2for</i> (AB) and CB2R) was cloned into <i>HindIII/BamHI</i> -digested pWM321  | This study |
| pAB10  | <i>HindIII/BamHI</i> -digested pAB10 <i>i</i> was sub-cloned into <i>HindIII/BamHI</i> -digested pJK200                                                                                                                                                                     | This study |
| pAB11i | <i>HindIII/BamHI</i> -digested fusion PCR product fusing the <i>mtaCB1</i> 1000 bp upstream region with the <i>mtaCB3</i> operon (using primers CB1L, p- <i>mtaC1+mtaC3rev</i> (AB), <i>mtaCB3for</i> (AB) and CB3R) was cloned into <i>HindIII/BamHI</i> -digested pWM321  | This study |
| pAB11  | <i>HindIII/BamHI</i> -digested pAB11 <i>i</i> was sub-cloned into <i>HindIII/BamHI</i> -digested pJK200                                                                                                                                                                     | This study |
| pAB12i | <i>HindIII/BamHI</i> -digested fusion PCR product fusing the <i>mtaCB2</i> 1000 bp upstream region with the <i>mtaCB1</i> operon (using primers CB2L, p- <i>mtaC2+mtaC1rev</i> (AB), <i>mtaCB1(p2-1)for</i> and CB1R) was cloned into <i>HindIII/BamHI</i> -digested pWM321 | This study |
| pAB12  | <i>HindIII/BamHI</i> -digested pAB12 <i>i</i> was sub-cloned into <i>HindIII/BamHI</i> -digested pJK200                                                                                                                                                                     | This study |
| pAB13i | <i>HindIII/BamHI</i> -digested fusion PCR product fusing the <i>mtaCB2</i> 1000 bp upstream region with the <i>mtaCB3</i> operon (using primers CB2L, p- <i>mtaC2+mtaC3rev</i> (AB), <i>mtaCB3(p2-3)for</i> and CB3R) was cloned into <i>HindIII/BamHI</i> -digested pWM321 | This study |
| pAB13  | <i>HindIII/BamHI</i> -digested pAB13 <i>i</i> was sub-cloned into <i>HindIII/BamHI</i> -digested pJK200                                                                                                                                                                     | This study |
| pAB14i | <i>HindIII/BamHI</i> -digested fusion PCR product fusing the <i>mtaCB3</i> 1000 bp upstream region with the <i>mtaCB1</i> operon (using primers CB3L, p- <i>mtaC3+mtaC1rev</i> (AB), <i>mtaCB1(p3-1)for</i> and CB1R) was                                                   | This study |

---

---

|         |                                                                                                                                                                                                                                                                                        |                  |
|---------|----------------------------------------------------------------------------------------------------------------------------------------------------------------------------------------------------------------------------------------------------------------------------------------|------------------|
|         | cloned into <i>HindIII/BamHI</i> -digested pWM321                                                                                                                                                                                                                                      |                  |
| pAB14   | <i>HindIII/BamHI</i> -digested pAB14 <i>i</i> was sub-cloned into <i>HindIII/BamHI</i> -digested pJK200                                                                                                                                                                                | This study       |
| pAB15i  | <i>HindIII/BamHI</i> -digested fusion PCR product fusing the <i>mtaCB3</i> 1000 bp upstream region with the <i>mtaCB2</i> operon (using primers CB3L, p- <i>mtaC3</i> + <i>mtaC2</i> rev (AB), <i>mtaCB2</i> (p3-2)for and CB2R) was cloned into <i>HindIII/BamHI</i> -digested pWM321 | This study       |
| pAB15   | <i>HindIII/BamHI</i> -digested pAB15 <i>i</i> was sub-cloned into <i>HindIII/BamHI</i> -digested pJK200                                                                                                                                                                                | This study       |
| pJK024  | <i>PmcrB-tetR-φC31int-attP</i>                                                                                                                                                                                                                                                         | Laboratory stock |
| pJK027A | cloning vector with <i>PmcrB(tetO1)</i> promoter and <i>φC31-attB</i>                                                                                                                                                                                                                  | (1)              |
| pRO024  | <i>mtaA1</i> (amplified by primers <i>mtaA1</i> art op fwd and <i>mtaA1</i> art op rev) was cloned into pCR®4-TOPO®                                                                                                                                                                    | This study       |
| pRO025  | <i>mtaB2</i> (amplified by fusion product of primers <i>mtaB2</i> art op fwd, <i>mtaB2</i> fuse fwd, <i>mtaB2</i> fuse rev and <i>mtaB2</i> art op rev) was cloned into pCR®4-TOPO®                                                                                                    | This study       |
| pRO026  | <i>mtaC2</i> (amplified by primers <i>mtaC2</i> art op fwd and <i>mtaC2</i> art op rev) was cloned into pCR®4-TOPO®                                                                                                                                                                    | This study       |
| pRO027  | <i>mtaB1</i> (amplified by fusion product of primers <i>mtaB1</i> art op fwd, <i>mtaB1</i> fuse fwd, <i>mtaB1</i> fuse rev and <i>mtaB1</i> art op rev) was cloned into pCR®4-TOPO®                                                                                                    | This study       |
| pRO028  | <i>mtaB3</i> (amplified by primers <i>mtaB3</i> art op fwd and <i>mtaB3</i> art op rev) was cloned into pCR®4-TOPO®                                                                                                                                                                    | This study       |
| pRO029  | <i>mtaC1</i> (amplified by primers <i>mtaC1</i> art op fwd and <i>mtaC1</i> art op rev) was cloned into pCR®4-TOPO®                                                                                                                                                                    | This study       |
| pRO030  | <i>mtaC3</i> (amplified by primers <i>mtaC3</i> art op fwd and <i>mtaC3</i> art op rev) was cloned into pCR®4-TOPO®                                                                                                                                                                    | This study       |
| pRO031  | <i>mtaA2</i> (amplified by primers <i>mtaA2</i> art op fwd and <i>mtaA2</i> art op rev) was cloned into pCR®4-TOPO®                                                                                                                                                                    | This study       |

---

---

|        |                                                                                                             |            |
|--------|-------------------------------------------------------------------------------------------------------------|------------|
| pRO032 | <i>NdeI/Nsil</i> -digested <i>mtaC1</i> from pRO029 was subcloned into <i>NdeI/Nsil</i> -digested pJK027A   | This study |
| pRO033 | <i>NdeI/Nsil</i> -digested <i>mtaC2</i> from pRO026 was subcloned into <i>NdeI/Nsil</i> -digested pJK027A   | This study |
| pRO034 | <i>NdeI/Nsil</i> -digested <i>mtaC3</i> from pRO030 was subcloned into <i>NdeI/Nsil</i> -digested pJK027A   | This study |
| pRO035 | <i>BglIII/Nsil</i> -digested <i>mtaB1</i> from pRO027 was subcloned into <i>BamHI/Nsil</i> -digested pRO032 | This study |
| pRO036 | <i>BglIII/Nsil</i> -digested <i>mtaB2</i> from pRO025 was subcloned into <i>BamHI/Nsil</i> -digested pRO032 | This study |
| pRO037 | <i>BglIII/Nsil</i> -digested <i>mtaB1</i> from pRO027 was subcloned into <i>BamHI/Nsil</i> -digested pRO033 | This study |
| pRO038 | <i>BglIII/Nsil</i> -digested <i>mtaB2</i> from pRO025 was subcloned into <i>BamHI/Nsil</i> -digested pRO033 | This study |
| pRO039 | <i>BglIII/Nsil</i> -digested <i>mtaB3</i> from pRO028 was subcloned into <i>BamHI/Nsil</i> -digested pRO033 | This study |
| pRO040 | <i>BglIII/Nsil</i> -digested <i>mtaB1</i> from pRO027 was subcloned into <i>BamHI/Nsil</i> -digested pRO034 | This study |
| pRO041 | <i>BglIII/Nsil</i> -digested <i>mtaB2</i> from pRO025 was subcloned into <i>BamHI/Nsil</i> -digested pRO034 | This study |
| pRO042 | <i>BglIII/Nsil</i> -digested <i>mtaB3</i> from pRO028 was subcloned into <i>BamHI/Nsil</i> -digested pRO032 | This study |
| pRO043 | <i>BglIII/Nsil</i> -digested <i>mtaB3</i> from pRO028 was subcloned into <i>BamHI/Nsil</i> -digested pRO034 | This study |
| pRO044 | <i>BglIII/Nsil</i> -digested <i>mtaA1</i> from pRO024 was subcloned into <i>BamHI/Nsil</i> -digested pRO036 | This study |
| pRO045 | <i>BglIII/Nsil</i> -digested <i>mtaA2</i> from pRO031 was subcloned into <i>BamHI/Nsil</i> -digested pRO042 | This study |
| pRO046 | <i>BglIII/Nsil</i> -digested <i>mtaA1</i> from pRO024 was subcloned into <i>BamHI/Nsil</i> -digested pRO038 | This study |
| pRO047 | <i>BglIII/Nsil</i> -digested <i>mtaA2</i> from pRO031 was subcloned into <i>BamHI/Nsil</i> -digested pRO038 | This study |
| pRO048 | <i>BglIII/Nsil</i> -digested <i>mtaA1</i> from pRO024 was subcloned into <i>BamHI/Nsil</i> -digested pRO039 | This study |
| pRO049 | <i>BglIII/Nsil</i> -digested <i>mtaA2</i> from pRO031 was subcloned into <i>BamHI/Nsil</i> -digested pRO039 | This study |

---



---

|        |                                                                                                             |            |
|--------|-------------------------------------------------------------------------------------------------------------|------------|
| pRO050 | <i>BglIII/Nsil</i> -digested <i>mtaA1</i> from pRO024 was subcloned into <i>BamHI/Nsil</i> -digested pRO041 | This study |
| pRO051 | <i>BglIII/Nsil</i> -digested <i>mtaA2</i> from pRO031 was subcloned into <i>BamHI/Nsil</i> -digested pRO041 | This study |
| pRO052 | <i>BglIII/Nsil</i> -digested <i>mtaA1</i> from pRO024 was subcloned into <i>BamHI/Nsil</i> -digested pRO035 | This study |
| pRO053 | <i>BglIII/Nsil</i> -digested <i>mtaA2</i> from pRO031 was subcloned into <i>BamHI/Nsil</i> -digested pRO036 | This study |
| pRO054 | <i>BglIII/Nsil</i> -digested <i>mtaA2</i> from pRO031 was subcloned into <i>BamHI/Nsil</i> -digested pRO037 | This study |
| pRO055 | <i>BglIII/Nsil</i> -digested <i>mtaA1</i> from pRO024 was subcloned into <i>BamHI/Nsil</i> -digested pRO040 | This study |
| pRO056 | <i>BglIII/Nsil</i> -digested <i>mtaA2</i> from pRO031 was subcloned into <i>BamHI/Nsil</i> -digested pRO040 | This study |
| pRO057 | <i>BglIII/Nsil</i> -digested <i>mtaA2</i> from pRO031 was subcloned into <i>BamHI/Nsil</i> -digested pRO035 | This study |
| pRO058 | <i>BglIII/Nsil</i> -digested <i>mtaA1</i> from pRO024 was subcloned into <i>BamHI/Nsil</i> -digested pRO037 | This study |
| pRO059 | <i>BglIII/Nsil</i> -digested <i>mtaA2</i> from pRO031 was subcloned into <i>BamHI/Nsil</i> -digested pRO043 | This study |
| pRO060 | <i>BglIII/Nsil</i> -digested <i>mtaA1</i> from pRO024 was subcloned into <i>BamHI/Nsil</i> -digested pRO043 | This study |
| pRO061 | <i>BglIII/Nsil</i> -digested <i>mtaA1</i> from pRO024 was subcloned into <i>BamHI/Nsil</i> -digested pRO042 | This study |

---

8  
9

## Supplementary References

- 10 1. **Guss, A. M., M. Rother, J. K. Zhang, G. Kulkarni, and W. W. Metcalf.**  
11 2008. New methods for tightly regulated gene expression and highly  
12 efficient chromosomal integration of cloned genes for *Methanosarcina*  
13 species. *Archaea* **2**:193-203.
- 14 2. **Pritchett, M. A., J. K. Zhang, and W. W. Metcalf.** 2004. Development of  
15 a markerless genetic exchange method for *Methanosarcina acetivorans*  
16 C2A and its use in construction of new genetic tools for methanogenic  
17 archaea. *Appl. Environ. Microbiol.* **70**:1425-33.

18  
19
